# Supplementary material
Source: PubMed Central journal article supplement (PMC3633638)

## Supplemental Information

**Figure S1. Donor NK cell engraftment in NK-competent Rag-1<sup>-/-</sup> hosts.** Percentage of total NK cells that were donor derived 1, 3, 7, and 21 days following adoptive co-transfer of control and cytokine-activated (pre-act) CFSE-labeled NK cells into Rag-1<sup>-/-</sup> hosts. Control NK cells were identified as CFSE<sup>+</sup> NK1.1 cells and cytokine-activated cells using a congenic marker (CD45.1 or CD45.2) and NK1.1. Results represent the mean +/- SEM of 3-7 independent experiments. \*p=0.009.

**Figure S2. NK cells do not develop in Rag-2<sup>-/-</sup>γ<sub>c</sub><sup>-/-</sup> hosts reconstituted with activated NK cells.** Naïve Rag-2<sup>-/-</sup>γ<sub>c</sub><sup>-/-</sup> mice had very few endogenous NK cells (left panel). Adoptive transfer of cytokine-activated CD45.1<sup>+</sup> NK cells did not stimulate the development of host, CD45.1<sup>-</sup> NK cells as late as 16 weeks, as shown in the right panel where nearly all NK1.1<sup>+</sup> NK cells are CD45.1<sup>+</sup> donor-derived.

**Figure S3. Recovery of pre-activated and control NK cells from different organs.** Cytokine-activated (Pre-act) or control-treated (Ctrl) congenic NK cells were adoptively co-transferred into Rag-2<sup>-/-</sup>γ<sub>c</sub><sup>-/-</sup> hosts and recovery of NK cells measured 1, 3, and 7 days later. (A) Absolute numbers of NK cells recovered from the spleen, lung, and liver. Results are representative of 4 independent experiments. (B) Ratio of cytokine-activated to control NK cells recovered from each organ. Results represent the mean +/- SEM of 4 independent experiments.

**Figure S4. Similar expression of activation markers on memory-like and control NK cells 1 and 4 weeks after adoptive transfer into alymphoid hosts.** Cytokine-activated and control NK cells from congenic Rag-1<sup>-/-</sup> mice were adoptively co-transferred into Rag-2<sup>-/-</sup>γ<sub>c</sub><sup>-/-</sup> hosts. After 1 or 4 weeks, splenic NK cells were isolated and stained with antibodies recognizing KLRG1, CD69, and CD11b. Pre-activated and control NK cells expressed similar levels of all of these receptors, with higher expression than NK cells from naïve unmanipulated Rag-1<sup>-/-</sup> mice. Data are representative of 3 independent experiments.

Fig. S1

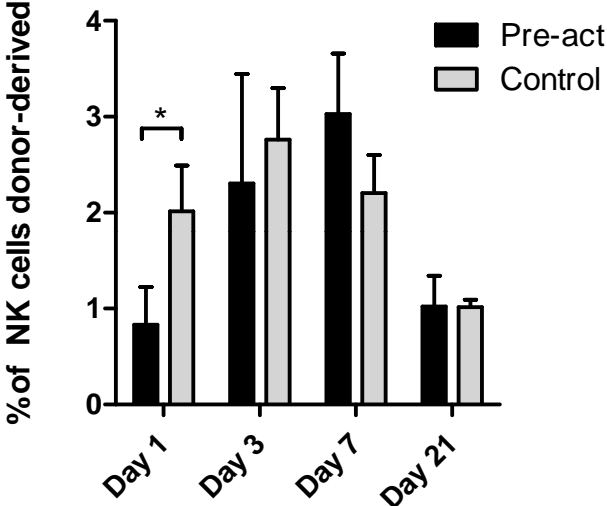

Fig. S2

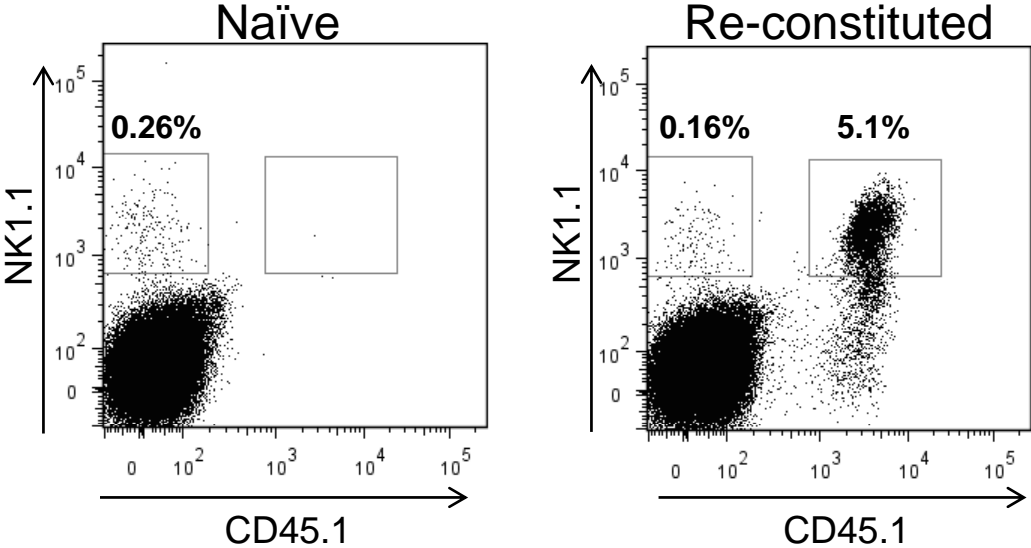

Fig. S3

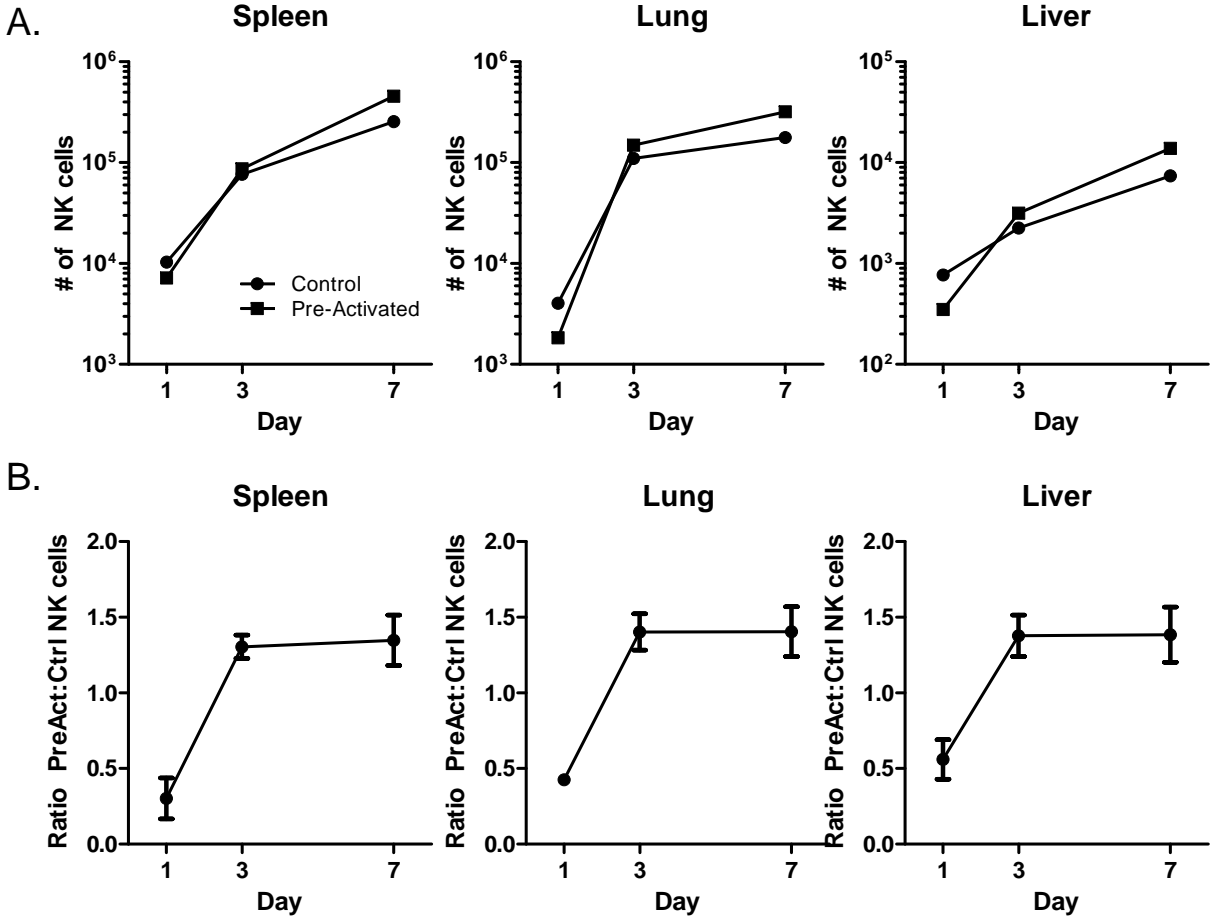

Fig. S4

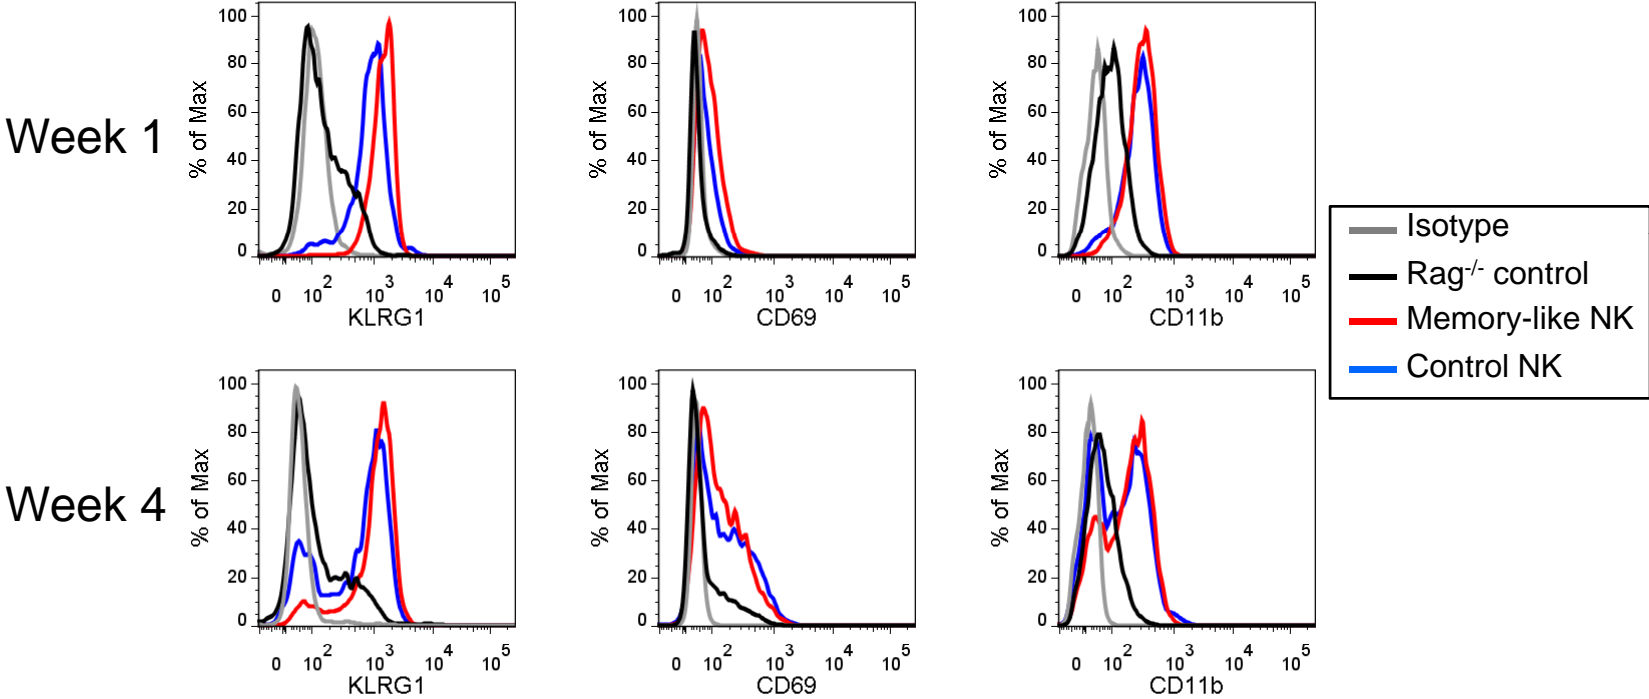

Supplement: NIHMS451588-supplement-1.pdf [file NIHMS451588-supplement-1.pdf]
